# Supplementary material for: A Linear Model for Transcription Factor Binding Affinity Prediction in Protein Binding Microarrays
Source: PLoS One. 2011 May 26;6(5):e20059. doi: 10.1371/journal.pone.0020059 (PMC3102690; doi:10.1371/journal.pone.0020059)
Supplement: Table S4 — Top 20 highest median intensity K-mers for all 86 HK array samples. Legend: This table lists the top 20 highest median intensity K-mers for each of the 86 HK array samples. By the median intensity of a K-mer we mean the median intensity across all probes that contained the K-mer. This table is provided for the purposes of comparing with Table S3. (XLS) [file pone.0020059.s007.xls]

## Sheet: top_median_kmers
TF	Top 20 K-mers (sorted in descending order of median intensity across HK array probes)
Cebpb	TTGCGCAA	TTTCGCAA	TTGTGCAA	TTGCGTAA	TTACGCAA	TTACGTAA	ATGATTGC	TGACGCAA	TTGCATCA	TTGCGAAA	TGTCGCAA	TGTTGCAA	TTTCGTAA	TTATGTAA	ATTGCGCA	TTGCAACA	TTGCGTCA	TTATGCAA	TTGCACAA	TTTTGCAA
Egr2	TAGGGGAC	AGGGGATA	CTTAGGGG	TTAGGGGT	GCCCACGC	AGCGGGGG	CAGCGGGG	CCGCCCAC	CGCCCACG	CGGGGGCG	GGGGGCGA	ACGCCCAC	CCCACGCA	CGCCCACA	CTGGGGG	GGGGGCG	TGGGGGC	CCTGGGGG	CGGGGTGA	CGTGGGCG
Esr1	CTGGGGG	TGGGGGC	CCTGGGGG	CGGGGTGA	CTGGGGGC	GGGGGCGG	TGGGGGCG	ACCGGGG	ACCGGGGC	TACCGGGG	TGAGGTCA	TGGGTCAT	CGGGGTCA	AGGTCACG	GAGGTCAT	GGGGTCAA	AGGGGTCA	GCTAGGGG	GGGTCATG	GGGTCATT
Foxj2	GTAAACAA	AGTAAACA	GTAAACAT	GGTAAACA	CGTAAACA	GTAAACA	ATAAACAA	TGTAAACA	TTGTTTAC	ATAAACAT	TAAACAAA	GATAAACA	TGTTTACA	GTAAACAC	TATAAACA	TTGTTTAT	CATAAACA	ATAAACA	GTCAACAA	GTAAACAG
Foxo1	GTAAACAA	CGTAAACA	AGTAAACA	GTAAACA	GTAAACAT	GGTAAACA	GTAAACAG	GTAAACAC	ATAAACAA	TGTAAACA	TTGTTTAC	GTCAACAA	AGGGGCTT	TAAACAAA	TGTCAACA	GATAAACA	TGTTTACT	ATAAACAT	TGTTTACA	GTGTTTAC
Foxo3	CGTAAACA	TTGTTTAC	GTAAACAA	AGGGGCTT	GTAAACA	ATAAACAA	TGTAAACA	GTAAACAG	GGTAAACA	GTAAACAT	GTAAACAC	TGTTTACG	AGTAAACA	TTGTTTAT	TGTTTACT	GTCAACAA	TGTCAACA	TGTTTAC	TGTTTACA	GTGTTTAC
Foxo4	GTAAACAA	CGTAAACA	AGTAAACA	GGTAAACA	GTAAACA	GTAAACAC	GTAAACAG	TGTTTACG	TTGTTTAC	TGTCAACA	CGTCAACA	GTCAACAA	TTGTTTAT	GATAAACA	ATCAACAA	GTAAACAT	CATAAACA	ATGTTTAC	GTCAACAC	GTCAACAT
Foxp1	GTAAACAA	AGTAAACA	CGTAAACA	GTAAACA	GTAAACAT	TGTAAACA	GGTAAACA	ATAAACAA	GTAAACAC	TGTCAACA	TTGTTTAC	GTAAACAG	TGTAAATA	TAAACAAA	GTCAACAA	TGTTTACT	AGTAAATA	TAAACAAC	GATAAACA	TGTTTACA
Foxp2	GTAAACAA	CGTAAACA	TGTAAACA	ATAAACAA	GTAAACA	GTAAACAT	AGTAAACA	GGTAAACA	GTAAACAC	TTGTTTAC	TGTAAATA	TGTCAACA	GTAAACAG	TGTTTACT	GTAAATAC	GTAAATAA	TAAACAAC	GTCAACAA	TGTTTACA	AGGGGCTT
Gmeb2	TACGTACG	ACGTACGT	CGTACGTA	CTGACGCA	GACGTACG	CGTACGTC	TTACGTAC	TTTACGTA	AACTGGGG	GACGCAAG	TTACGTCA	TTACGTAA	ACGTACGA	ACGTACGC	TACGTAAT	TGACGTCG	CTTACGTA	GCTTACGT	ACGTACG	TACGTATA
Irf2	TTTCGATT	TTTCGTTT	TTTCACTT	GGAGGGGT	TTTCGGTT	GTTTCGAT	TTTCATTT	TTTCGCTT	TTTCAGTT	GTTTCGTT	TCACTTTC	TTTTGTTT	CTTTCGAT	ACTTTCGA	TTTCTTTT	TTTCTCTT	TTCCTTTC	TTACTTTC	CTTTCTTT	TTTCTGTT
Junb	GGGGGG	CGGGGGG	GGGGGGC	CCGGGGGG	CGGGGGGC	GCCGGGGG	GGGGGGCC	CCGGGGG	GGGGTGCC	ATGAGTCA	GGCCGGGG	ATGACTCA	GGGGACGC	TATGGGGA	AAGGGGG	AAGGGGGC	CAAGGGGG	CGGGGCTA	GTGGGGTG	CGACGGGG
Mecp2	GTGTAAAT	GTGTAATA	TGTGTAAT	TGTAATTA	GTGTGATT	GTGTGACT	GTGTAATT	TGACAATT	TACAGTGT	GGGGGG	CGGGGGG	GGGGGGC	CCGGGGGG	CGGGGGGC	GCCGGGGG	GGGGGGCC	TGTGATTA	TGGTGTAA	ATTACACA	ATAAATTA
Nr2c1	GCTTGGGG	GGGGTCAT	TGGGGTCA	AGGGGTCA	GCTAGGGG	GGGGGTC	GGGGTCA	GGGGGTCA	GGGGTCAG	AAAGGTCA	AATGGGGT	GGGGTCAA	TTGGGGTC	CTAGGGGT	AAGGTCAT	ATGGGGTC	AGAGGTCA	CGGGGTCA	TGACCTTT	AAGGTCAA
Pou3f1	TGCATAAT	ATTATGCA	TAATTAGT	TTAATTAG	TTATGCAT	ATAATTAA	AATTAATT	TTAATTAA	CATAATTA	TGAATAAT	TAATTAAG	ATAATTAG	GGGGTTG	GGGGTTGC	AATAATTA	CTAATTAG	ATTAATTA	TAATTAAC	TATAATTA	CTCATTAT
Sox14	ATAACAAT	TAACAATA	AACAATAG	TAAAGGGG	TAACAATG	AACAATGT	TTAACAAT	TAACAAT	AACAATAA	AGAACAAT	CCATTGTT	AACAATG	AACAATGA	CAACAATG	CTAACAAT	ACAATGGT	ATTGTTCT	ATTGTTTT	AACAATGG	ATTATAAT
Sp1	GATCGGGG	GAAGGGGC	CTGGGGG	TGGGGGC	CCTGGGGG	CGGGGTGA	CTGGGGGC	GGGGGCGG	TGGGGGCG	GAGGGGCA	GGGGGA	GGGGGAC	GGGGGACT	GAGGGGG	GGGGGCG	AGGGGGCG	GAGGGGGC	GGAGGGGG	GGGGGCGT	ACGCCCAC
Tbx3	AGGTGTGA	CCGAGGGG	GAGGGGTG	CTAGGGGC	TAGGGGCA	AGGTGTTA	GGGGGG	CGGGGGG	GGGGGGC	CCGGGGGG	CGGGGGGC	GCCGGGGG	GGGGGGCC	AGGTGTCA	AGGTGCGA	AACACCTT	CGAGGTGT	ACACCTCA	GACACCTA	TTCACACT
Tcf3	CACCTGCG	ACACCTGC	ACACCTGG	GGCAGGTG	GCAGGTGG	GCAGGTGC	CACCTGTT	CAGGTGTT	GCAGGTGT	CAGGTGCA	ACAGGTGT	CACCTGGG	CCAGGTGT	CAGGTGTG	CACCTGCA	GCACCTGC	CAGGTGCG	CCAGGTGC	ACCAGGTG	ACAGGTGC
Zscan20	GGGGATAC	GTGGGGAT	GTGTAGAC	GGGGGG	CGGGGGG	GGGGGGC	CCGGGGGG	CGGGGGGC	GCCGGGGG	GGGGGGCC	GTCTACAC	TGGGGATA	GTATACTA	GGGGTTTG	CACCATTA	GTATACAC	CAAGGGGC	TACTACAT	GTATAGAC	CGTCTACA
Ar	GGGAACAT	AGGTACAT	AGGAACAT	GGAACATA	GAGGGGG	AGGGGGCG	GAGGGGGC	GGAGGGGG	GGGGGCGT	GGTACATT	CTGTTCTT	CGGTACAT	GGTACATC	AGAACATC	TAGGAACA	GGAACATT	GGTACACA	GGGTACAC	CGGTACAC	CCGTTCTG
Dbp	TTACGTAA	TTATGTAA	TTATATAA	TTACATAA	TTATGCAA	TTACGTCA	TTGCGTAA	TTACGCAA	TGACGTAA	ATTACGTA	TTGCATAA	TTATGTCA	TTAGGTAA	TATTACGT	TACGTAAT	ACTATTAT	GTTACGTA	TGTTACGT	TTACGTA	TTACCTAA
Foxo6	TTGTTTAC	TGTTTACG	GTTGTTTA	GTAAACAA	CGTAAACA	TGTTTACA	GTAAACAC	GTAAACAG	TTGTTTAT	TGTTTACT	GTAAACA	GGTAAACA	ATAAACAA	TGTAAACA	ATGTTTAC	TGTTTAC	AGTAAACA	TGTTTACC	GTCAACAA	GATGTTTA
Klf12	GGGGCCTA	ACTCGGGG	TGGGGCAC	TGGGGCTC	CGTAGGGG	TAGGGGCC	GGGGGG	CGGGGGG	GGGGGGC	CCGGGGGG	CGGGGGGC	GCCGGGGG	GGGGGGCC	CGGGGCTA	CGGGGCCG	GGGGCCGC	TCGGGGCA	GGGGCAAG	GGGGCAC	GGGGCACC
Klf8	TGGGGCAC	GGGGCCTA	GGGGTTG	GGGGTTGC	TGGGGCTC	GGGGCAGT	CCGAGGGG	GAGGGGTG	GGGGTTAT	GTATGGGG	TGGGGTTA	CGGGGCTA	CCACGCCC	ACGCGGGG	CGCGGGGT	GGGGCTCC	GGGGTTCT	GTGTGGGG	GAGGGGCA	GGAGGGGT
Klf9	ATGGGGAT	ACCGTTAC	TACCGTTA	TCCGTTAT	AACCGTTA	ACCGTTAT	GACCGTTA	ACCGTTA	CCGTTATA	ATAACGGT	ACCGTTAG	ATCCGTTA	CCGTTATT	CCGTTAT	CCGTTATC	GTCCGTTA	CCGTTATG	CCGTTACT	ATAACGGA	GATAACGG
Mlx	TCACGTGA	TGCACGTG	GCACGTGT	GCACGTGA	GTCACGTG	AGCACGTG	CACGTGAT	CACGTGAC	CACGTGGT	CCCACGTG	TCACGTGG	GCACGTG	CCACGTGG	CACGTGA	CACGTGGC	ATCACGTG	GCACGTGG	CACGTGCT	TCACGTG	GCCACGTG
Mzf1	CAGGGGAT	TTCGGGGA	GGGGATGG	AGGGGATG	TAGGGGAT	GGGGAGCG	GGGGATTT	TCGGGGAT	GGGGTAAC	GGGGAGGC	GGGGATCC	GTTCGGGG	ATGGGGAA	AGGGGAGC	GGGGAATC	ATGGGGAT	GAGGGGCG	AATCCCCA	AGGGGAAT	TGGGGATA
Mzf1	CAGGGGAT	TTCGGGGA	GGGGATAC	GTGGGGAT	GGGGTAAC	TCGGGGAT	AGGGGATG	GGGGATGG	GGGGAGCG	TGGGGATA	GGGGGG	CGGGGGG	GGGGGGC	CCGGGGGG	CGGGGGGC	GCCGGGGG	GGGGGGCC	GTTCGGGG	TAGGGGAT	GGGGATCC
Nfil3	GGGGATAC	GTGGGGAT	TTATGTAA	TTACGTAA	TTACATAA	TGGGGATA	GGGGGG	CGGGGGG	GGGGGGC	CCGGGGGG	CGGGGGGC	GCCGGGGG	GGGGGGCC	GTAATACT	GTAATAAT	TTACGTCA	TTATATAA	GGGGACGC	TATGGGGA	TTATGCAA
Nr2f6	GGGGGTC	GGGGGTCA	GGGGTCAG	AGGGGTCA	GCTAGGGG	GGGGTCA	AATGGGGT	AAAGGTCA	GGGGTCAT	TGGGGTCA	AGAGGTCA	GCTTGGGG	AAGGTCAC	TGACCTTT	AAGGTCAT	GGGGTCAA	GAGGTCAT	GAGGTCAA	TGACCTCT	AAGGTCA
Nr4a2	TGACCTTT	AAAGGTCA	CGACCTTT	GTGACCTT	GGGGGG	CGGGGGG	GGGGGGC	CCGGGGGG	CGGGGGGC	GCCGGGGG	GGGGGGCC	GAAGGTCA	ATAGGTCA	TGACATTT	TAACCTTT	AAAGGTCG	AAAGGTTA	TAAGGTCA	AAGGTCAC	TGACCTAT
Pou2f1	ATTTGCAT	GGGGTTG	GGGGTTGC	ATTTAAAT	ATGCTAAT	ATTATGCA	TTAATTAG	TGCATAAT	TAATTAGT	TTTGCATA	TATGCAAA	ATAATTAA	CTCATTAT	ATAATTAG	CTAATTAG	TTAATGAG	CCTAATTA	TTAATTAA	TAATTAGG	AATAATTA
Mypop	TTTGCGCC	CTTTGCGC	TTGCGCCA	TTGCGCCG	TTGCGCAA	TTAGCGCC	ATTGCGCC	TTGCGCGC	TTAGCGCT	TTTTGCGC	GTTTGCGC	GTTGCGCC	CTTAGCGC	TAGCGCTA	TTTGCGC	AGGGGTGA	TTGCGCCC	TTGCGCC	TTTGCGCG	GTTAGCGC
Pou1f1	GGGGTTG	GGGGTTGC	TGAATAAT	TTAATTAA	ATAATTAA	TTAATTAG	TAATTAGT	TGCATAAT	ATGCATAA	TTATTCAT	TAATTAAG	TTAATGAG	TTATGCAT	ATAATGAG	TAATTAAC	TGCATAAA	ATTATGCA	CTAATTAG	CATAATTA	AATAATTA
Prdm11	ATTGCGGG	TTTGCGGG	GGGGCAGT	TTGCGGGT	AATTGCGG	ATTTGCGG	TTGCGGGA	TTTTGCGG	TTTGCGGA	TTAGCGGA	GTTTGCGG	TTGCGGG	TTTGCGGC	TTTGCGG	GATTGCGG	ATTGCGGA	CTTTGCGG	ATTGCGG	TTGCGGAA	CATCGGGG
Rorb	AATGGGGT	TGGGGTCA	ACCGGGG	ACCGGGGC	TACCGGGG	AGGGGTCA	GCTAGGGG	CTAGGTCA	GGGGTCAT	GGGGTCA	GCTTGGGG	GGGGTCAA	CTGGGTCA	AGGTCACG	TAGGTCAC	GAGGTCAC	ATGGGGTC	AGAGGTCA	GAGGTCAA	CGAGGTCA
Sox10	TAAAGGGG	CCATTGTT	AAAGGGGT	ATTGTTCT	ATAACAAT	CTATTGTT	ATTGTTTA	ATTGTTTT	CATTGTTA	ATTGTATT	ATTGTTAA	CATTGTTT	ATTGTTGT	AATTGTTC	ATTATAAT	CAATTGTT	TATTGTTA	TAACAATA	AATTCATT	CATTGTTC
Sox3	ATAACAAT	TAAAGGGG	TAACAATA	AACAATGT	TAACAATG	AACAATAG	TTAACAAT	ATTATAAT	AACAATGG	CAACAATG	AACAATGA	AGAACAAT	AACAATG	GAACAATA	GAACAATG	GTAACAAT	AATTGTTC	ACAATGTA	ACACAATA	TAACAAT
Sox6	TAAAGGGG	ATTGTTCT	CCATTGTT	AATTGTTC	TAATTGTT	ATTGTTTT	AAAGGGGT	CTATTGTT	CAATTGTT	CTGGGGG	TGGGGGC	CCTGGGGG	CGGGGTGA	CTGGGGGC	GGGGGCGG	TGGGGGCG	TATTGTTA	CATTGTTT	CATTGTTA	ATTGTCTT
Srebf1	TCACGTGA	CACGTGAT	ATCACGCG	GTCACGTG	ATCACGTG	TCACGTGT	TCACGCCA	ACACGTGA	TCACGCGT	GTCACGCG	CACGTGTT	CACGTGAG	TCACGTG	TCAGGTGA	TCACGCGA	CTCACGTG	TCACCTGA	CGCGTGAT	TGGCGTGA	CACGTGA
Tbx2	AGGTGTGA	AGGTGTTA	TTTCACAC	AGGTGTCA	AGGTGTCG	TTCACACT	GACACCTC	TTCACACC	GACACCTT	ACACCTCA	GAGGTGTT	AGGTGTTG	AAGGTGTT	AACACCTT	AAGGTGTC	TTGACACC	TGACACCT	CCGAGGGG	GAGGGGTG	AACACCTC
Tbx20	AGGTGTTA	AGGTGTGA	TTTCACAC	AGGTGTCA	CCGAGGGG	GAGGGGTG	GGTGTGAA	TTCACACC	TTCACACT	CGAGGGG	CGAGGGGT	AGGTGCGA	GGGTGTGA	AAGTGTGA	AGTGTGAA	TTGACACC	GGGGAGGT	TAGTGGGG	TTAACACC	CTTCACAC
Tbx4	AGGTGTGA	AGGTGTTA	AACACCTT	GAGGTGTT	TCACACCT	GACACCTT	AGGTGTCA	GACACCTC	ACACCTCA	GTCACACC	TAACACCT	CCGAGGGG	GAGGGGTG	AACACCTC	TGACACCT	TTTCACAC	TTCACACC	AGAGGTGT	TCACACTT	ACACCTTT
Tbx5	AACACCTT	AGGTGTGA	TCACACCT	GACACCTC	AACACCTC	GACACCTT	ACACCTCA	AGGTGTTA	TAACACCT	TTCACACC	CGACACCT	TGACACCT	CCGAGGGG	GAGGGGTG	GAGGTGTT	ACACCTCG	AGGTGTCA	CACACCTC	CAACACCT	CTAACACC
Tcfec	TCACGTGA	GTCACGTG	ATCACGTG	CACGTGAC	CACGTGAT	GCACGTGA	CACGTGA	CTCGTGAT	TCACGTG	TCACGTGG	TCATGTGA	AGCACGTG	GTCACGAG	CCACGTGA	ACCACGTG	CTCGTGAC	TCACGTGC	TCACGAGG	CATGTGAC	ACACGTGA
Xbp1	TGACGTGG	CACGTCAT	ACACGTGG	ACGTCATC	CCACGTCA	CACGTCAC	ACACGTGT	ATGACGTG	CGTCATCA	ATGACGAG	CCACGTGG	GACACGTG	ATACGTGT	TGATGACG	GATGACGT	ACACGTCA	ACACGTAT	TGACGTGT	GATGACGA	ACGTCATA
Zfp202	CTGGGGG	TGGGGGC	CCTGGGGG	CGGGGTGA	CTGGGGGC	GGGGGCGG	TGGGGGCG	GGGGGA	GGGGGAC	GGGGGACT	TAGGGGG	GTAGGGGG	TAGGGGGC	AGGGGCAT	CAGGGGCA	GGGGGTC	GGGGGTCA	GGGGTCAG	TGGGGG	TTCGGGGA
Zfp263	GTGCTCCC	GGGAGCAC	GGAGCACT	AGTGCTCC	GTCCTCCC	GGTGCTCC	GGGAGGAC	GGGGAGCG	AGTCCTCC	GGAGCACC	TGGAGCAC	GTGCTCCA	GTGCTCC	CTAGGGGA	GGGATCAC	GGAGCAC	AGGAGCAC	GAGTGCTC	TAGTGCTC	CTCCTCCC
Zfp3	GGGGGG	CGGGGGG	GGGGGGC	CCGGGGGG	CGGGGGGC	GCCGGGGG	GGGGGGCC	ACTCGTAT	GGGGCAGT	CTGGGGG	TGGGGGC	CCTGGGGG	CGGGGTGA	CTGGGGGC	GGGGGCGG	TGGGGGCG	GGGGATAC	GTGGGGAT	CCGGGGG	GGCCGGGG
Zfx	GGGGGG	CGGGGGG	GGGGGGC	CCGGGGGG	CGGGGGGC	GCCGGGGG	GGGGGGCC	TAAGGGGC	GGTTGGGG	GTTGGGGC	GGGGCCTA	CCGGGGG	TAGGCCGC	GGCCGGGG	CTAGGCCG	GGGGATAC	GTGGGGAT	TAGGCCTA	ATGCGGGG	GGGGCCCG
Zkscan1	TAGTGGGG	CTGGGGG	TGGGGGC	CCTGGGGG	CGGGGTGA	CTGGGGGC	GGGGGCGG	TGGGGGCG	GCGGGGTC	GTGGGGTG	GGGGGG	CGGGGGG	GGGGGGC	CCGGGGGG	CGGGGGGC	GCCGGGGG	GGGGGGCC	TTGTGCAC	TGGGGG	ACCTACTA
Zscan10	GGGGATAC	GTGGGGAT	GGGGGG	CGGGGGG	GGGGGGC	CCGGGGGG	CGGGGGGC	GCCGGGGG	GGGGGGCC	TGGGGATA	TGAGGGGT	GGGGGA	GGGGGAC	GGGGGACT	GTGCACTT	TGCACTTC	GCACTCAC	CTGGGGG	TGGGGGC	CCTGGGGG
Ahctf1	AGGGGTGC	CAAGGGGT	CTGGGGCA	ACAAGGGG	AAGGGGTG	GGGGCATT	TTCTGGGG	CTAGGGGC	TAGGGGCA	TCTGGGGC	TTTATTTT	GTACGGGG	TTATTTTT	ATTTATTT	TTCTTTTT	TTTTATTT	TTATTTTA	ATTAATTT	AATTTATT	TATTTTTT
Atf3	TGACGTCA	CGTCATCA	ACGTCATC	GATGACGT	TGATGACG	GGGGATAC	GTGGGGAT	CGATGACG	TTACGTCA	GGGGGG	CGGGGGG	GGGGGGC	CCGGGGGG	CGGGGGGC	GCCGGGGG	GGGGGGCC	GATGACGC	GTCATCAT	GCGTCATC	GATGACGG
Atf4	GGGGGG	CGGGGGG	GGGGGGC	CCGGGGGG	CGGGGGGC	GCCGGGGG	GGGGGGCC	TGACGTCA	CCGGGGG	GGCCGGGG	TCTTATAT	TATTCTCA	TGTATTAT	TTATTGGT	TACATTAT	TATTGATT	TTTCATGA	TTTTGTCA	GTCGTTAT	TAATTAGT
Dnajc21	CGGGGGT	GGGGGTT	TCGGGGG	CGGGGGTT	GGGGGTTT	TCGGGGGT	TTCGGGGG	CGGGGCTA	CCCACCAT	CCACCATA	CCCCACCA	CTAGGGGC	TAGGGGCA	CTGGGGCT	GGGGCTAA	TGGGGCTA	GGGGCAGT	ATCTCCTT	CTGGGGCA	ACCCTCAT
Dmrtc2	TATACATT	GTATACTA	TACATTAT	ATACATTA	TCTTATAT	TAATGTAT	ACCTAATT	TGTAACAT	TTACACCA	TACACACA	TACACCAA	TATAAATC	ATATCACA	CTAGGGGC	TAGGGGCA	TACTGTAA	ACATTACT	ACATTAAT	GTACAACA	ACTATAAT
Egr3	TAGGGGAC	AGGGGACG	CGCCCACG	CCGCCCAC	ACGCCCAC	GCCCACGC	CGCCCACA	CCCCCGCA	CGTGGGCG	CCCACGCA	CGCCCCCG	AGGGGATA	CACCCACG	CGCCCAC	GCCCCCGC	TGCCCACG	CCCACGCG	ACGCCCCC	CGCCCACT	GCCCACGT
Esrrb	CAAGGTCA	AAGGTCAC	TGACCTTG	GAAGGTCA	AAGGTCAT	ATGACCTT	AAGGTCA	AAGGTCAA	AAAGGTCA	TTGACCTT	GACCTTGA	TGACCTT	GTGACCTT	TGACCTTC	TGACCTTT	TAAGGTCA	GGGGATAC	GTGGGGAT	GGGGGG	CGGGGGG
Esrrg	CAAGGTCA	AAGGTCAC	GAAGGTCA	AAGGTCAT	TGACCTTG	AAGGTCA	AGGGGTCA	GCTAGGGG	ATGACCTT	AAGGTCAA	AAAGGTCA	GGGGTCGA	TAGGGGTC	CAAGGTCG	TTGACCTT	GACCTTGG	CGACCTTG	GAAGGTCG	GGGGTCAT	GACCTTGA
Foxc2	TAAACAAA	TGTTTACA	GTAAACAA	TTGTTTAC	TTGTTTAT	AGTAAACA	ATAAACAA	TTTGTTTT	TTTTGTTT	ATGTTTAT	TGTTTATA	AAACAAAA	TTTATTTT	AAAACAAA	TGTTTATT	GTTGTTTA	GTTTGTTT	AATGTTTA	GTAAACAC	TTGTTATT
Foxg1	TTGTTTAC	TGTTTACA	TTGTTTAT	ATGTTTAC	TGTTTAC	TGTTTATA	GTGTTTAC	TGTTTACC	GTTGTTTA	TGTTTACT	TTTGTTTA	AATGTTTA	TTTGTTTT	GTTTGTTT	TAAACAAA	GTGTTTAT	ATGTTTAT	TCTGTTTA	GGGGTGCC	TGTTTAT
Gata4	AGATAAGA	TGATAAGG	AGATAAGG	TAGATAAG	TGATAAGC	GATAAGGA	TAAGATAA	CTGATAAG	AAGATAAG	GATAAGAT	GATAAGCT	TTGATAAG	AGATAACA	TGATAAG	GAGATAAG	GAGGGGG	AGGGGGCG	GAGGGGGC	GGAGGGGG	GGGGGCGT
Mybl2	TAACGGTT	ATAGGGGT	TAGGGGTT	TAACGGTC	GACCGTTA	AACCGTTA	AACGGTTG	CAACGGTT	AACCGTTG	CGACCGTT	GCAACGGT	AACGGTCG	AACGGTTA	AACGGTT	AAACGGTT	CAACGGTC	GACCGTTG	TAACCGTT	ACCGTTAC	AAACCGTT
Nhlh2	GGGGGG	CGGGGGG	GGGGGGC	CCGGGGGG	CGGGGGGC	GCCGGGGG	GGGGGGCC	GGGGATAC	GTGGGGAT	GCAGCTGC	CGCAGCTG	TGGGGATA	GGGGTGCC	AGCAGCTG	GCAGCTG	CTGGGGCA	CCGGGGG	CAGCTGAC	GGCCGGGG	TACACACA
Nkx2-9	AAGTACTT	TCAAGTGC	CTTAAGTG	TTAAGTGT	TTAAGTGC	GTTAAGTG	TTAAGTGG	TCAAGTAC	CTCAAGTG	TCAAGTGG	TCAAGTGT	CATAAGTG	GTCAAGTG	TTAAGTG	TTCAAGTG	TAAGTACT	TGAGTACT	TCAAGTG	TAAGTACC	TTAAGTAC
Nr2e1	CGGGGCCG	GGGGCCGC	AAAGTCAA	AAAAGTCA	AAGTCAAT	AAGTCATT	AGAAGTCA	GGGGATCA	AAGTCAAA	TTAAGTCA	TTGACTTT	GTAAGTCA	AAGTCATA	GGAGTCAT	AAGTCAA	TGGAGTCA	GGAGTCAA	AAAGTCA	TAAGTCAG	AAGTCAAC
Nr2f1	GCTTGGGG	GGGGTCGA	TGGGGTCA	GGGGTCAT	AAAGGTCA	AATGGGGT	GGGGTCA	AGGGGTCA	GCTAGGGG	TAGGGGTC	GGGGGTC	GGGGGTCA	GGGGTCAG	GGGGTCAA	GGGTCATG	GGGTCAAG	AAGGTCAC	GAGGTCAA	GGGTCACT	ATGGGGTC
Nr5a2	CAAGGTCA	TGACCTTG	AAGGTCAC	GTGACCTT	TTGACCTT	AAGGTCA	GACCTTGA	AAGGTCAT	GAAGGTCA	TCAAGGTC	TGACCTTT	AAAGGTCA	ATGACCTT	AAGGTCAA	CAAGGTCG	AAGGTCGT	TGACCTT	GTCCTTGA	GGGGATAC	GTGGGGAT
Pou1f1	GGGGTTG	GGGGTTGC	TTAATTAG	ATAATTAA	TTAATTAA	TAATTAAG	TAATTAAA	TGAATAAT	AATAATTA	TAATTAGT	TAATTAA	CTAATTAG	ATTAATTA	ATAATTAG	CATAATTA	TTTAATTA	ATAATGAG	ACTAATTA	TAATTAAC	TTAATGAG
Rarg	GGGGTCA	AAAGGTCA	AATGGGGT	AGGGGTCA	GCTAGGGG	GCTTGGGG	GGGGTCAT	TGGGGTCA	AAGGTCAT	GGGTCATG	CGAGGTCA	GAGGTCAT	AGGTCACG	GAGGTCAA	AAGGTCAC	AAGGTCA	AAGGTCAA	GAGGTCAC	AGGTCACT	GGGTCAAG
Rfx7	TAGCAACC	CTAGCAAC	GTTGCTAT	TGGCAACG	CGTTGCTA	CCGAGGGG	GAGGGGTG	AGGGGTGA	AGGAGGGG	TAGCAACG	GGTTGCTA	GGTTACCA	AGGGGCAT	CAGGGGCA	GTTGCTA	GTTGCTAC	TTGGCAAC	TGTTGCTA	AGCAACCG	ATAGCAAC
Rora	AATGGGGT	TGGGGTCA	GGGGTCAA	AGGGGTCA	GCTAGGGG	ACCGGGG	ACCGGGGC	TACCGGGG	GGGGTCAT	ATGGGGTC	CTAGGTCA	GAGGTCAC	GGGGTCA	GCTTGGGG	CTGGGTCA	AGGTCAAC	AGGTCACC	TGACCCAG	TAGGTCAC	CGAGGTCA
Sdccag8	AATATATT	TTTTTTTC	TTTTTTTT	TAATTATT	ATTAATTT	AATTTATT	ATTTATTT	TTTATTTT	AAATATTT	TATTTATT	TTATTTTC	ATTATTTT	ATATTAAT	TATTAATA	AATTATTT	TAATATTT	ATTAATAT	TATTAATT	AATATTTT	ATTTAAAT
Snai1	GGGGCAGA	TGGGGCAG	TGACAGCT	TTTGACAG	CTGTCAAA	AGCTGTCA	ATGACAGG	TTGACAGC	ACCTGTCA	AACTGTCA	ATGACAGC	TGACAGGT	TGACAGC	TGACAGCA	TATGACAG	GCTGTCAT	CTGACAGC	TGACAGCG	GCTGTCAA	GGGGTTAC
Sp140	GTACGGGG	AACGTCGT	GGGGAGGT	TGGGGACC	GGGGATAC	GTGGGGAT	TCGTACGA	TTACGTAA	GGGGCAGT	GGGGACGC	TATGGGGA	ACGGAAAA	CCGTACGG	CGAATCCG	TACGGAAA	TTCGTCGT	TACGTACG	ACGTCGTC	TCGCGCGA	TACCGTAA
Tbx1	TTTCACAC	GGGGATAC	GTGGGGAT	TTTTATTT	TTCTTTTT	TTTTTATT	TTCGTTTT	TTCATTTT	TTTTTGTT	TTTATTTT	TTTTTATC	TTCACACT	TTGTTTTC	TATCTTAA	TTTGTTTT	TTTCGTTT	TTTTGTTT	TTCACACC	TTCTTTTC	TCTATACA
Zbtb1	ATCCGGGG	GGGGCGCG	CCCGCAAA	GGGGAAGT	TCCCGCAT	TAGGGGAC	CCGGGGCG	TCCGGGGC	GGGGCAGT	ACCCGCAA	GTCCCGCA	CCCGCACG	CCCCGCAA	GGGGTTCA	CACCGCAA	TCACGCGT	AACCCGCA	ACCCCGCA	CCCGCAAC	CCCGCATA
Zfp300	GGGGGG	CGGGGGG	GGGGGGC	CCGGGGGG	CGGGGGGC	GCCGGGGG	GGGGGGCC	TGGGGCAC	GGGGATAC	GTGGGGAT	GGGGTTTG	TCGGGCAT	TTTTTGTT	CCGGGGG	GGCCGGGG	GTTGTTTT	ATATTAAT	TTGTTTTC	AGTTTTTT	TTTTATTC
Zfp637	TATATATA	TCTATATA	ATCTAGAT	ATATATAC	TATATGTG	TATATCTA	TATATCCA	GTATACTA	AGATATAT	AAATATAT	AATATATC	ATATATAT	TTTATACC	TATATACA	TACCTAAT	AACGTATT	TTTATGTT	ATAATATA	AATATATA	ATATATGT
Zic5	GAGGGGAC	GGGGGA	GGGGGAC	GGGGGACT	GGGGTTCG	TGGGGCGC	CTGGGGG	TGGGGGC	CCTGGGGG	CGGGGTGA	CTGGGGGC	GGGGGCGG	TGGGGGCG	GAGGGGG	GGGGGCG	AGGGGGCG	GAGGGGGC	GGAGGGGG	GGGGGCGT	TTCGGGGA
Zkscan5	TCACCTCC	GGGGGG	CGGGGGG	GGGGGGC	CCGGGGGG	CGGGGGGC	GCCGGGGG	GGGGGGCC	TTTATTTT	CTCACCTC	GGAGGTGA	CCGGGGG	GGCCGGGG	TCAACTCC	TCACTTCC	TTCTTTTT	TCTACTCC	TTCTACTC	TGTTTTGT	TCTGTTTG
Zfp740	CAGGGGAG	GGGGAGTG	CTGGGGG	TGGGGGC	CCTGGGGG	CGGGGTGA	CTGGGGGC	GGGGGCGG	TGGGGGCG	TTCGGGGA	GGGGGA	GGGGGAC	GGGGGACT	AGGGGAGT	TAGGGGG	GTAGGGGG	TAGGGGGC	CGGGGTCT	CTCGGGGT	GGGGTCTG
Zscan10	GGGGAGCG	GGGGGG	CGGGGGG	GGGGGGC	CCGGGGGG	CGGGGGGC	GCCGGGGG	GGGGGGCC	TAGGGGAT	GGGGATTT	TTCTGGGG	CCGGGGG	GGGGTCTT	TGGGGTCT	AGGGGAGC	CGGGGAGG	CAGGGGAT	GGCCGGGG	ATTCCCCC	GGGGGA
Zscan10	CAGGGGAT	GGGGGG	CGGGGGG	GGGGGGC	CCGGGGGG	CGGGGGGC	GCCGGGGG	GGGGGGCC	GGGGAGCG	GGGGGA	GGGGGAC	GGGGGACT	GGGGATAC	GTGGGGAT	AGGGGATG	GGGGCAGT	GGGGATGG	TAGGGGAT	GGGGTGCC	GGGGTTCT
